# Supplementary material for: The cement of the tube-dwelling polychaete Sabellaria alveolata: a complex composite adhesive material
Source: Beilstein J Nanotechnol. 2025 Nov 11;16:1998–2014. doi: 10.3762/bjnano.16.138 (PMC12621633; doi:10.3762/bjnano.16.138)
Supplement: File 2 — Sabellaria alveolata adhesive proteins and FAM20C kinases candidates identified through in silico analyses. Complete list of Sabellaria alveolata adhesive proteins and FAM20C kinases candidates identified through in silico analyses. Indicated are the NCBI accession number of the transcript if available, the transcript ID from the transcriptome of the anterior part of the worm, the amino acid length, proportion of transcripts in the transcriptome, completeness of the ORF, presence of a signal peptide, molecular weight, isoelectric point, the conserved domain, the top reciprocal BLAST hit, and the amino acid composition, with color coding indicating lower or higher amino acid concentrations. [file Beilstein_J_Nanotechnol-16-1998-s002.xlsx]

## Sheet: Feuil1
* The indicated FPKM value corresponds to the proportion of ID transcripts within the transcriptome of the anterior part of S. alveolata.																						"+"	"+ +"	"- -"	" -"
** Indicated differential expression come from Buffet et al., 2018.
														reciprocaol hit BLASTP				amino acid composition (%)
		ID NCBI	ID transcriptome UMONS	amino acid sequence	corresponding contig in Buffet et al., 2018	length (aa)	FPKM*	Log2FoldChange**	complete	signal peptide	molecular weigth	pI	CDD	Name	ID (%)	e-value	reference	A	G	M	S	C	H	N	T	D	I	P	V	E	K	Q	W	F	L	R	Y
Cement proteins	Sa-1	HE599563	comp225468_c0_seq2	MKVLVLLALVSAVYSCGWNGRGACGGGACGKACGAKAYGFGGKAGYGVYGKGAYGAKGLGYGNKAAYGGFGKGAYGAKGLGYGNKAAYGGFGRGAYGAKGLGYGGKASYGAYGKGAYGAAKGFGYGNKAGYGAYGKGAYG AKGLGYGNKVGYGAYGKGAYGAKGLGYGSKGGYGAYGKGAYGAKGLGYGSKGGYGAYGKAKVGSGAKAAG YGTKGGYGGAYGKGAYGKTGY	Contig5884	231	30403.89	- 4.25	Y	Y	21961.67	9.86	NA	cement precursor protein 1 [Sabellaria alveolata]	100	6e-122	CCD57419.1	17.3	36.4	0.4	2.6	1.7	0	2.2	0.9	0	0	0	3	0	13	0	0.4	1.7	4.3	0.9	15.2
	Sa-2	HE599584	comp271660_c3_seq1	MKLLILVALAASISCALACGGAGCGGGWGAAKGGACGGGWGSKGGCGAHKAAWGVHKAAWGAGHGYGGVHKAAWGAGHGYGVVHKAAGFGYGAHKAAWGHKAAGYGAGGYGVHKAAGYGGYGVHKAAGLGGYGVHKAAGYGGYGVHKAAGLGGYGVHKAAGYGGYGVHKAAGYGGYGVHKAAGLGGYGAHKAAGYGGYGAGAHKAAAGYGYGAHKAAAGYGYGAHKAAAGYGGY	Contig14044	234	23866.74	- 3.95	Y	Y	21970.57	9.71	NA	cement precursor protein 2 [Sabellaria alveolata]	100	2e-127	CCD57440.1	23.9	32.9	0.4	1.3	2.1	8.1	0	0	0	0.9	0	5.1	0	8.5	0	2.6	0.4	3.4	0	10.3
	Sa-3A	HE599605	comp282003_c2_seq7	MKTIVLFAFVLIALCLVHSEARAYGSSSSYSSSSSSSSSSSYSSSSSSSSSSSSSSSSSSSSSSSSSSSS SSSSSSSSSSSSSSSSSYTSGSTSSSRSSGAGSSSSSSSGDGSSSSASSSSSNSSGSSNSDNSSRSSARS SGSSRRSSQSSSNFGMNLRFNMKKSSSESSRSSSSSSSSSNDSSDSSSSSGSSSSSRSSGSSNSSSASSG RSSSSSSSSSSSSSYSSS	Contig292	228	3233.57	- 4.88	Y	Y	21731.45	10.20	NA	cement precursor protein 3A [Sabellaria alveolata]	100	3e-07	CCD57471.1	3.5	5.3	1.3	67.1	0.4	0.4	3.5	1.3	1.8	0.9	0	1.3	0.9	1.3	0.4	0	1.8	2.2	4.4	2.2
	Sa-3B	HE599626	comp267107_c0_seq4	MKTFAVFAFVLVALCIFHTEAKSYGKSSSSYSSSSSSSSSSSYSSSSSSSSSSSSSSSSSSYSSSSDSSS YSKSSSSSSSSGRSSSRSSGSSESSASSTSSSQSKGSSQSKSSARSCSKSSSEYGLCMKFNVDKSSSDSS CSSSSSSSSGRGSSSSSSSSSSSSSGKSSSYSSSYSSSTSSSYSSSSNSSSSSYSSSSSYSSSSSSSYSS SSSSHH	Contig4990	216	1867.62	- 4.96	Y	Y	21249.37	9.37	NA	cement precursor protein 3B [Sabellaria alveolata]	100	4e-97	CCD57482.1	2.8	3.7	0.9	64.8	1.9	1.4	0.9	1.9	1.4	0.5	0	1.9	1.4	4.6	0.9	0	2.3	1.4	1.9	5.6
	Sa-3C	/	comp199754_c0_seq1	MKGITLLLLAAVTCCALASPPYYGRGGKYSSSSSISSSDFKYGHRGYGYGKHGYSSSSSSSSSYSSSSSSSSSSSSYSSSSSSSSSSSSSSSSSSSSSSSSSSSSSSYSSSSSSSSSSSSYSSSSSSSSSSSSSSSSSSSSSYSSSSSGSSSSSSSSSSSYSSSSSSSSSSSSSSSSSSSSSSSSSSSSSSYSSSSSSSSSSSYSSSSSSSSSSSYSSSSSSSSSSSYSSSSSSSSSSSYSSSSYRYRHGKYRYSSSSKSSSDYRKGYRYGKGGYGKGVAYCNGGAYGKGGAYGKGGAYGKGGAYGKGGAYGKVGPNGKGGAYGKAGPYGKGGAFGKGGAYGKGGPLCIGGPFGKGGAFGKGGALGKGGPFGIEGPHGKAGPYGGGPGGPAGPKAGAFG…	Contig3247	405	252	- 4.07	Y	Y	38442.50	9.8	NA	NA				4.9	17.8	0.2	47.9	1	1	0.5	0.5	0.5	1	3.5	0.7	0.2	5.9	0.2	0	1.5	1.7	1.7	9.1
	Sa-5	/	comp278784_c3_seq5	MKLSTIVLITVIGYASAGALYGGWGGGWGSGWGGGWHTHGPVYHAPVVHHAPLYHTHVGMPGTTHNININHQPAPAPHWHPYPYPYPRSRRRGGTVIIGGGKYGLFGKKGGGAGALLALGGLTGGGGW	Contig32934	128	3880.1	- 4.02	Y	Y	13233.07	10.14	NA	NA				7.8	25	1.6	3.1	0	8.6	2.3	6.2	0	5.5	8.6	5.5	0	3.1	0.8	4.7	0.8	7	3.1	6.2
														reciprocaol hit tblastn
FAM20C kinases	SaFAM20C-1	NA	comp253537_c0_seq2	MMRFYGRFALFFFLLLCLLVMKKQVITLFGTAREDTALRIVEGDTDLINKPTFIKNKENRNIESPKEGNGILQRENQVINKFMSTEFLKPQYGSSALPDKHMEVIDELQKHIQSLNISLLEIKELLSVNSTMTASSKHRMPTRVKHINTTDNDIITRAPNDYVSSERSTVHTQATDEYFASDIVQYQKYRNIWNWANNSISHESLFPGKSPEVDTVLNALATARILSIEWFTMGKKFYENGTSFKWIAMLEGGQKAVIKLAWEEFGGQKKGGRCNDGHELPAAEIAAFHLHRILGFYNTPYVSGRWIDLIHEIYPVACEFVRKQITLLPNGDACVSSGILMYNDNQTLCVSGGKIKASIGYWIPRPLKLYTWYPKYAPFSMARKEWLDIGFNNKSYCDK…	S954889	545	1.3	NDE	Y	Y	62650.04	8.79	Fam20C-like Superfamily	Helobdella robusta hypothetical protein partial mRNA	46.54	1e-103	XM_009033198.1	5.7	5.9	2.6	6.6	2	2.6	5.9	5.3	5.3	7	3.9	4.6	5.5	7.3	3.1	1.8	5.1	10.1	5.1	4.6
	SaFAM20C-2	NA	comp288995_c0_seq4	MKLKQRVVGGLVLCLVLMGVVMLKGSLSFPSHLTDTDDTVLKSPHRVKPRHMDPFVRNSVRLSNDANNAGANHMPNAYANNMPNVDAPESQMKNGLNELMGHLNVMRQELDASNYTSNDRSPEGQRVQSRQSPPSPDQQLQKLILGDKYIMNRADDIIRLAHVIEETRAGGDVSKNDKPKEFIPNADVEFDKRSQFETGLNDDSDIPPGHEYIRIRKAKERELMADQVEKYEREQKQIQRMEVYILPLVMHELEDIATKMTKTRRPSHRRRGATFKIASGSIKNLTGWEKFHNHITQFDMYDPKDPAIQQVLDDLARQPLVELYQHDGGTQLKIVYWLENDGRALFKPMRFTRDHETLPNHFYFSDYERHTAEIASFHLDKVLDFHRVPPTAGRAVNMT…	NA	635	5.5	/	Y	Y	73581.78	8.49	Fam20C	Octopus sinensis extracellular serine/threonine protein kinase FAM20C-like	51.03	3e-159	XM_029780782.2	5.2	5.2	3.9	5.7	1.4	4.4	4.6	4.7	8.3	4.7	5.4	5.5	4.9	6.3	4.4	0.8	4.1	8.8	7.7	3.9
	SaFAM20C-3	NA	comp284991_c0_seq1	MMKLKERVIAFAVLCSLFYAFLVLAKYTNILNNTPLRSHQFSADEIFKDSKSQDAHLSMLRRELSLQKEDSGSDSLKFDPKEALKVFILNDKVILQEADSIIQIAEILKESRNPKKQKYPEYPNNTHYHFQTYGDYHIIRKKPNFNESSNDHVAYRKQVESEIKEVRETQWQREQRHQKRISVNLPEHVIEELEGVLKKMKENDLTVPKKTAPNLDIWHLKPGRTELRTWEVFHNHITPFDLYKPEDPIIDKILHDLTNLPVVELYQHAGGTQIKFVYWFEHNGRALFKPMRFKRDMETLPDHYYFSDYERHNAEIASWHLDKVLGFHRVPPTAGRIMNITRDIQELADKDLHGTFFISPAGNLCFYGQCDYYCDSNHAVCGNPTMIEGSMAQYLPSTN…	S12522	577	4.14	NDE	Y	Y	67865.53	8.47	Fam20C	Octopus sinensis extracellular serine/threonine protein kinase FAM20C-like	50.98	8e-142	XM_029780782.2	4.9	4	2.1	5.5	1.6	5	4.5	4.3	7.1	6.2	5.2	4.7	6.4	8.0	3.5	1.4	5.0	9.5	6.4	4.7
	SaFAM20C-4	NA	comp280217_c0_seq2	MKLKWRVVFSVFLVFIFYVSYKILEPELHQGGGRRDDGGIYDKADTGNSREFDSDIQEMPLPYNASRGVREKYLLQMYDLQWDRPLKEDPWKVAESWVTHRQVHPDYIPELGAILKWMSVATIQLADVGYKGTQLKMLLQLQGNIPVAFKPKWFGRDEIIPGKAWNGADRHFGEIAGFHLNRILGLNKVPLVVGRTLDLKEEIMPVAKKELLKTFYTKGANTCFYGKCLYCKNESTGVCGEGEFMEGAIVLWLPTKYKYQKWRHPYQRTYKEGKSARWEEDDSYCSLVVKQQELFQNGPRLGDILDAAVYDYLILNADRHHYETMSEPWDSMLVMFDSGKSFASPHYDEESILAPLTQCCVIRKNLYERLLMLKDGVLSKVLKDILNNDPISPVLSNLH…	NA	433	2.22	/	Y	Y	50098.79	6.4	Fam20C-like Superfamily	Crassostrea gigas glycosaminoglycan xylosylkinase (LOC105346290)	47.58	3e-141	XM_011454801.3	5.3	6.9	2.8	4.6	1.8	2.3	3.5	3	6.7	5.3	4.8	6.7	6.9	7.6	3.5	2.8	3.7	11.3	5.3	5.1
	SaFAM20C-5	NA	comp278295_c0_seq4	MRFRIRGIRCQVAFFVVLMGLVSVYFILFESSTLPDPSSVYFSKDELEKLILNKNIFHNVTYKSPFEAVYKNIMERQAKNKSMWQMLHPTESPVVREEKYRKVWQWANDSISQEGLFPGDAPQADLVLKALATARIVSVGGLDMSEYESGTSVKWIAQLEGGQKAVIKLVWEKDEWSFSKAKNVIDGQLQSPCNAGHEMCFSEIAGWHLHRVLGFYNTPYVSGRQLSLIEEIYPVANEAVRKQISILPGGDACITAKCYLCKYPQRLCVARGMIDASIAYWIPRPLKLYTYPPGYMPYSTPRMDRWEHIGFNNKTYCKELRQTIEPYEKQRYYNDLFDFAVLDTLMYHYDSKHYVVDDNSKARGLTIRLDHGRAFCFFDEDNAEIFLAPITQCCSLRKT…	S2309521	465	3.65	NDE	Y	N	53895.22	8.54	Fam20C-like Superfamily & signal peptide peptidase SppA (cl32615)	Helobdella robusta hypothetical protein partial mRNA	43.8	7e-126	XM_009033198.1	6.2	4.9	2.8	6.7	2.6	1.9	3.9	3.9	4.9	5.8	4.9	6.5	6.5	6.5	3.7	2.2	4.3	9.9	6.2	5.8
